# Supplementary material
Source: publisher site journal article supplement (https://www.dovepress.com/article/supplementary_file/551666/551666%20Revised%20supplementary_materials.docx)
Supplement: Supplementary file 1 [file 551666%20Revised%20supplementary_materials.docx]

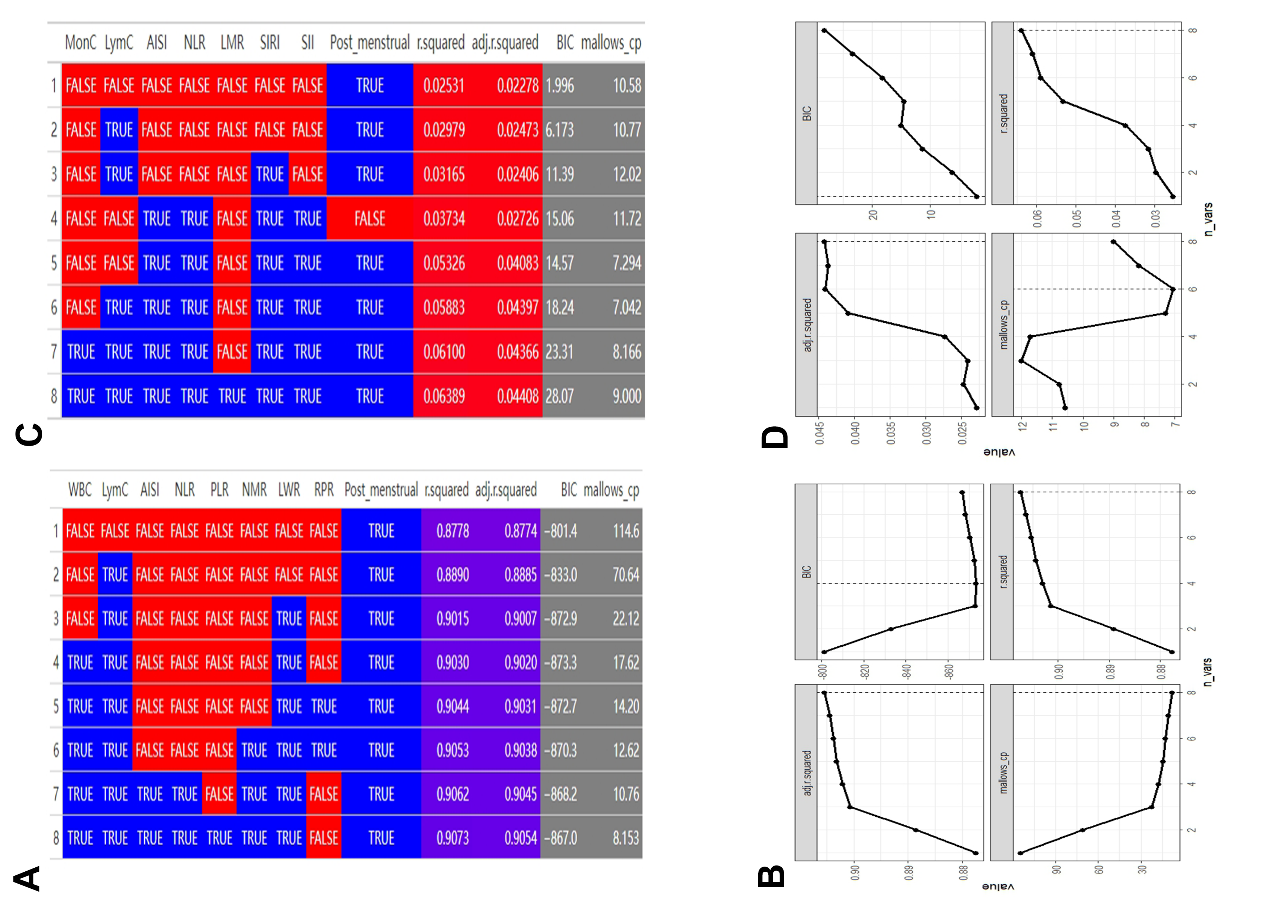


Supplementary Figure 1. Optimal subset of predictive variables screened by BIC.(a)Optimal subset combination for predicting pregnancy;(b)Trend diagram of the optimal subset for predicting pregnancy and included variables;(c)Optimal subset combination for predicting recurrence;(d)Trend diagram of the optimal subset for predicting recurrence and included variables.Notes.Red indicates inclusion, and blue indicates exclusion of predictive variables.


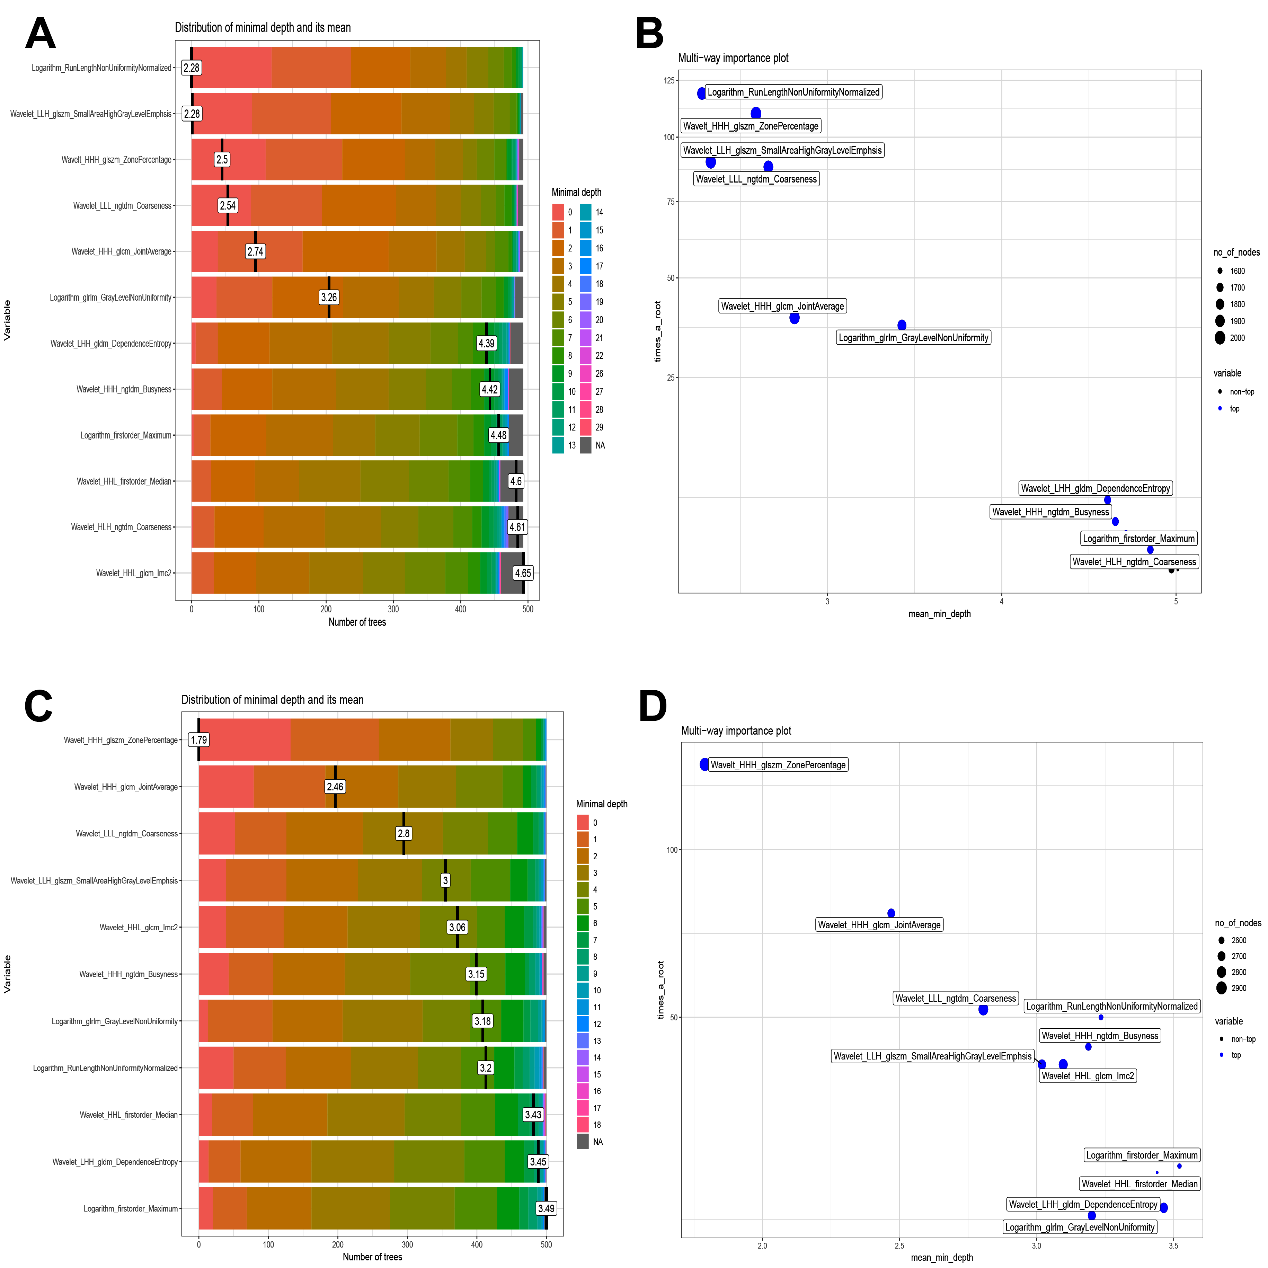


Supplementary Figure 2. Optimal subset of ultrasound radiomics variables screened by random forest.(a)Variable weight ranking for predicting pregnancy based on SHAP;(b)Dot plot showing weights of variables for predicting pregnancy;(c)Variable weight ranking for predicting recurrence based on SHAP;(d)Dot plot showing weights of variables for predicting recurrence.


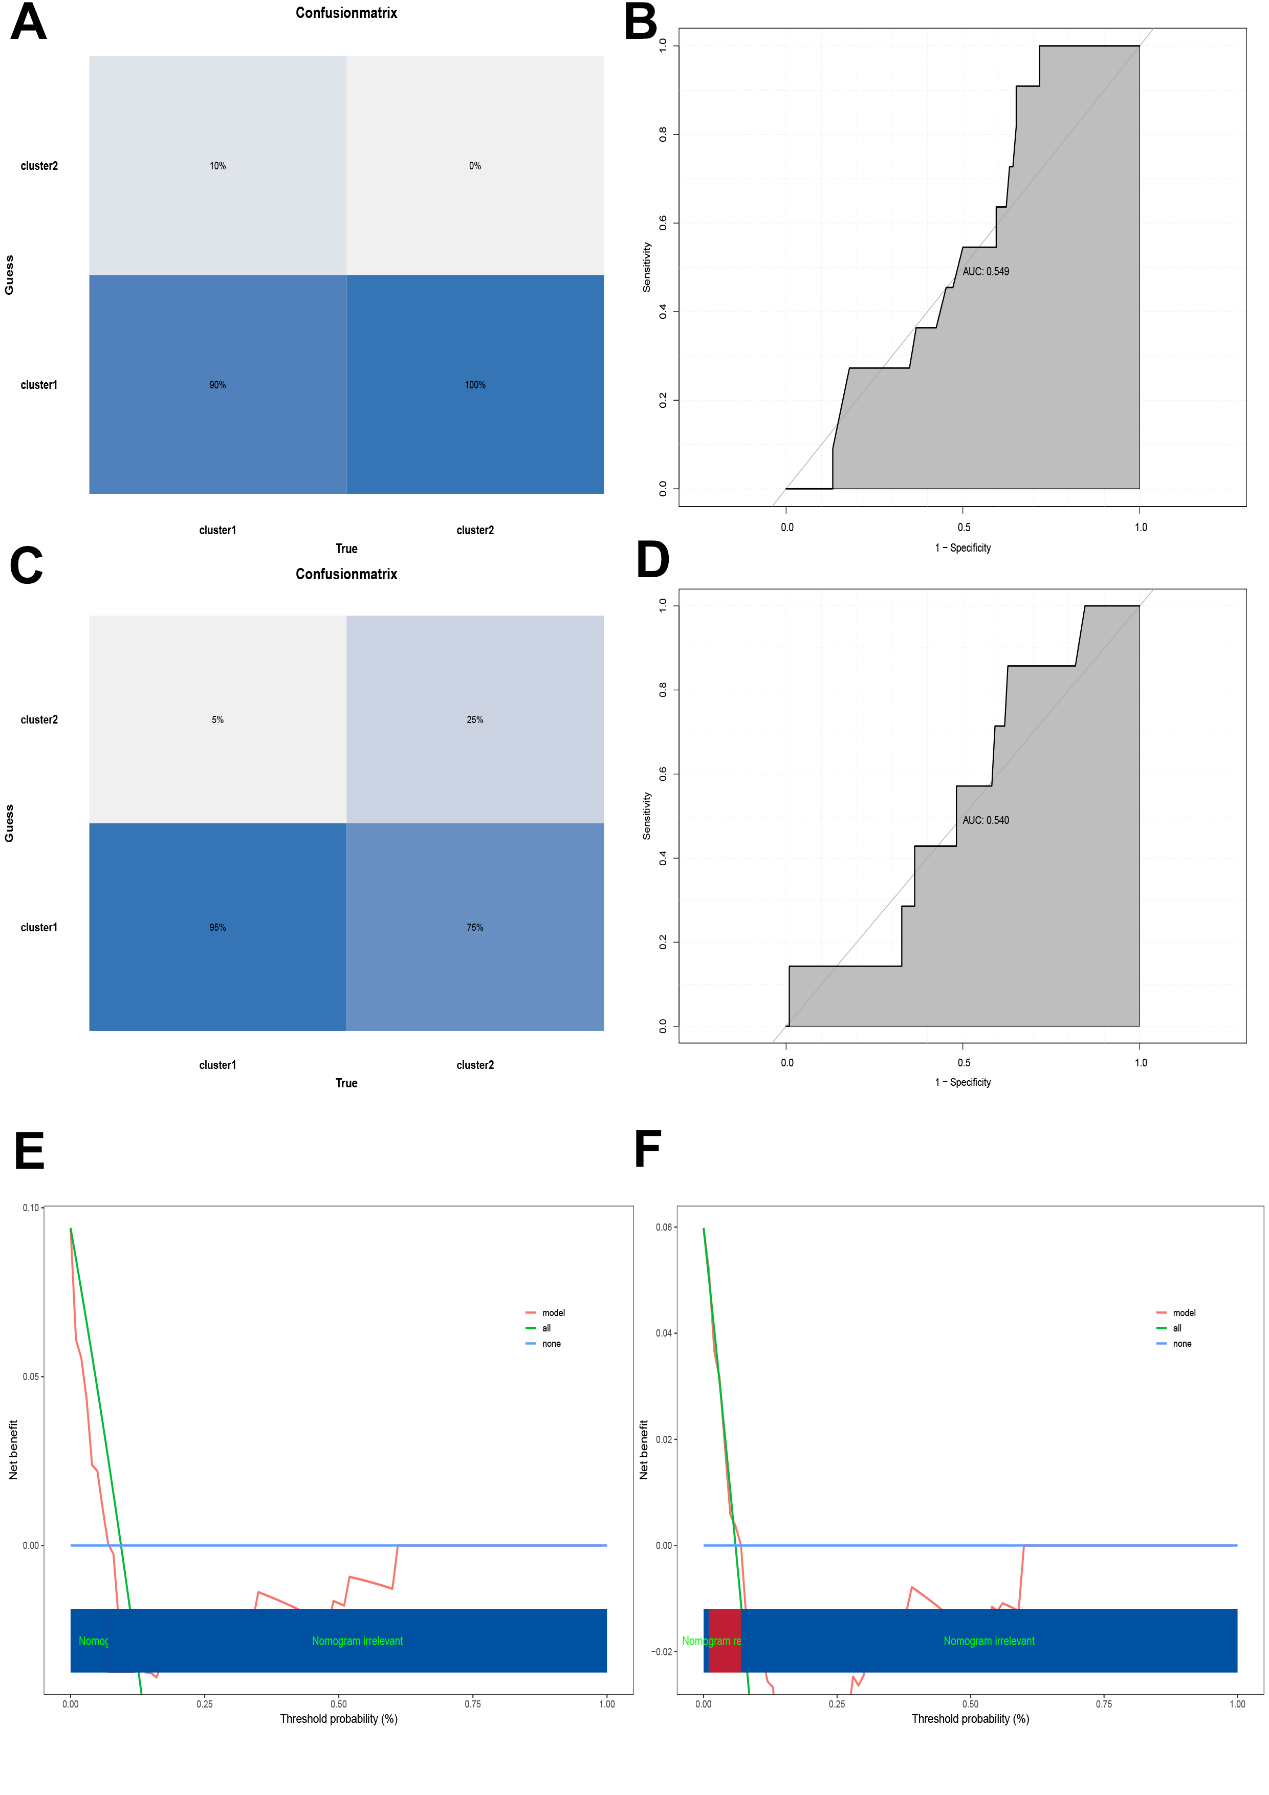


Supplementary Figure 3. Evaluation of predictive model efficacy for pregnancy and recurrence based on random forest.(a) Nomogram of the pregnancy prediction model;(b) ROC curve of the pregnancy prediction model;(c) Nomogram of the recurrence prediction model;(d) ROC curve of the recurrence prediction model;(e) DCA of the pregnancy prediction model; (f) DCA of the recurrence prediction model

Supplementary table 1. Comparison of Scoring Parameters and Ranges Among Four Intrauterine Adhesion (IUA) Scoring Systems

| **Scoring System** | **Year & Guideline Title** | **Key Scoring Parameters** | **Severity Classification & Scoring Ranges** |
| --- | --- | --- | --- |
| March | 1978; *Classification of Intrauterine Adhesions* | - Extent of adhesion (percentage of uterine cavity involved) | - Mild: Adhesion involves <1/4 of uterine cavity, membranous type, no involvement of fallopian tube opening |
| - Location of adhesion (anterior wall, posterior wall, fundus, fallopian tube opening) | - Moderate: Adhesion involves 1/4–1/2 of uterine cavity, mixed membranous/fibrous type, possible involvement of one fallopian tube opening |
| - Type of adhesion (membranous, fibrous, muscular) | - Severe: Adhesion involves >1/2 of uterine cavity, fibrous/muscular type, involvement of both fallopian tube openings or uterine cavity atresia |
| ASRM (American Society for Reproductive Medicine) | 1988; *Practice Committee Opinion on the Diagnosis and Management of Intrauterine Adhesions* | - Extent of adhesion (0–3 points: <1/3, 1/3–2/3, >2/3 of uterine cavity) | - Mild: Total score 1–4 points |
| - Type of adhesion (0–4 points: membranous, fibrous, dense fibrous, muscular) | - Moderate: Total score 5–8 points |
| - Menstrual pattern (0–2 points: normal, hypomenorrhea, amenorrhea) | - Severe: Total score 9–10 points |
| ESGE (European Society for Gynecological Endoscopy) | 2017; *ESGE Guideline on the Diagnosis and Treatment of Intrauterine Adhesions* | - Extent of adhesion (percentage of uterine cavity involved) | - Mild (I–II grade): Adhesion involves <1/3 of uterine cavity, membranous/mild fibrous type, no involvement of fallopian tube opening |
| - Density of adhesion (membranous, mild fibrous, dense fibrous) | - Moderate (III grade): Adhesion involves 1/3–2/3 of uterine cavity, mixed mild/dense fibrous type, possible involvement of one fallopian tube opening |
| - Involvement of fallopian tube opening (uninvolved, partially involved, completely occluded) | - Severe (IV–V grade): Adhesion involves >2/3 of uterine cavity, dense fibrous type, involvement of both fallopian tube openings or uterine cavity atresia |
| CSGE (China Society of Gynecological Endoscopy) | 2015; *Expert Consensus on the Diagnosis and Treatment of Intrauterine Adhesions in China* | - Extent of adhesion (0–3 points: <1/3, 1/3–2/3, >2/3 of uterine cavity) | - Mild: Total score 1–4 points |
| - Type of adhesion (0–3 points: membranous, fibrous, dense fibrous, muscular) | - Moderate: Total score 5–8 points |
| - Endometrial thickness (0–2 points: ≥7 mm, 4–6 mm, <4 mm) | - Severe: Total score 9–12 points |
| - Menstrual volume (0–2 points: normal, reduced by 1/3–2/3, reduced by >2/3 or amenorrhea) |  |

Note: ASRM = American Society for Reproductive Medicine; ESGE = European Society for Gynecological Endoscopy; CSGE = China Society of Gynecological Endoscopy. The ESGE scoring system was used as the main diagnostic criterion for IUA severity in this study, considering its detailed classification of adhesion density and fallopian tube opening involvement, which is highly consistent with clinical practice needs for evaluating postoperative recurrence risk.

Supplementary table 2. Parameters displayed from transvaginal three-dimensional ultrasound images

| **Category** | **Specific Parameters** |
| --- | --- |
| **First-order Features** | Mean, Variance, Skewness, Kurtosis, Minimum, Maximum, Range |
| **Texture Features** |  |
| - Gray Level Co-occurrence Matrix (GLCM) | Contrast, Correlation, Homogeneity, Energy, Entropy |
| - Gray Level Run Length Matrix (GLRLM) | Short Run Emphasis, Long Run Emphasis, Run Length Non-Uniformity, Gray Level Non-Uniformity, Run Percentage |
| - Gray Level Size Zone Matrix (GLSZM) | Small Area Emphasis, Large Area Emphasis, Area Size Non-Uniformity, Gray Level Non-Uniformity, Zone Percentage |
| - Neighboring Gray Tone Difference Matrix (NGTDM) | Coarseness, Contrast, Busyness, Complexity, Strength |
| **Shape Features** | Volume, Surface Area, Sphericity, Elongation, Compactness, Major/Minor Axis Lengths |
| **Frequency Domain Features** | Fourier Transform-based Features (e.g., Energy in Frequency Bands) |
| **Wavelet Features** | Coefficients from Multi-Resolution Decomposition (Approximation and Detail Coefficients) |
